# Supplementary material for: The Association between Mental Health Symptoms and Quality and Safety of Patient Care before and during COVID-19 among Canadian Nurses
Source: MDPI journal article supplement (doi:10.3390/healthcare10020314), 2022-02-07
Supplement: s1 [file s1]

**Table S1.** The proportion of various severities of mental health symptoms before and during COVID-19

|                              | n (%)        |                 |
|------------------------------|--------------|-----------------|
|                              | Pre-COVID-19 | During COVID-19 |
| No Anxiety                   | 1621 (37.7)  | 878 (26.5)      |
| Mild Anxiety                 | 1474 (34.3)  | 1174 (35.5)     |
| Moderate Anxiety             | 690 (16.1)   | 664 (20.1)      |
| Severe Anxiety               | 510 (11.9)   | 594 (17.9)      |
| N                            | 4295         | 3310            |
| No Depression                | 1647 (38.4)  | 922 (28.0)      |
| Mild Depression              | 1321 (30.8)  | 1004 (30.5)     |
| Moderate Depression          | 712 (16.6)   | 704 (21.4)      |
| Moderately Severe Depression | 409 (9.5)    | 428 (13.0)      |
| Severe Depression            | 205 (4.8)    | 231 (7.0)       |
| N                            | 4294         | 3289            |
| No PTSD                      | 2259 (52.3)  | 1885 (52.6)     |
| PTSD                         | 2062 (47.7)  | 1700 (47.4)     |
| N                            | 4321         | 3585            |
| Low EE                       | 894 (21.5)   | 584 (18.3)      |
| Moderate EE                  | 951 (22.8)   | 676 (21.1)      |
| High EE                      | 2320 (55.7)  | 1939 (60.6)     |
| N                            | 4165         | 3199            |
| Low DP                       | 1787 (42.9)  | 1531 (47.9)     |
| Moderate DP                  | 1104 (26.5)  | 799 (25.0)      |
| High DP                      | 1276 (30.6)  | 868 (27.1)      |
| N                            | 4167         | 3198            |
| Low PA                       | 1329 (32.2)  | 1031 (32.8)     |
| Moderate PA                  | 1427 (34.6)  | 1046 (33.3)     |
| High PA                      | 1367 (33.2)  | 1064 (33.9)     |
| N                            | 4123         | 3141            |

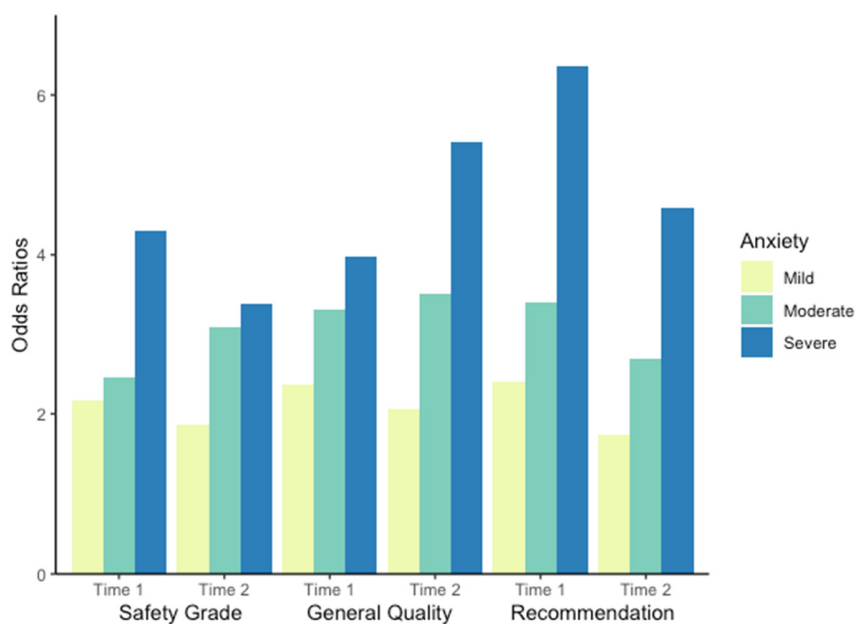

**Figure S1.** A visual depiction of odds ratios representing the relationship between anxiety and quality safety outcomes before and during COVID-19

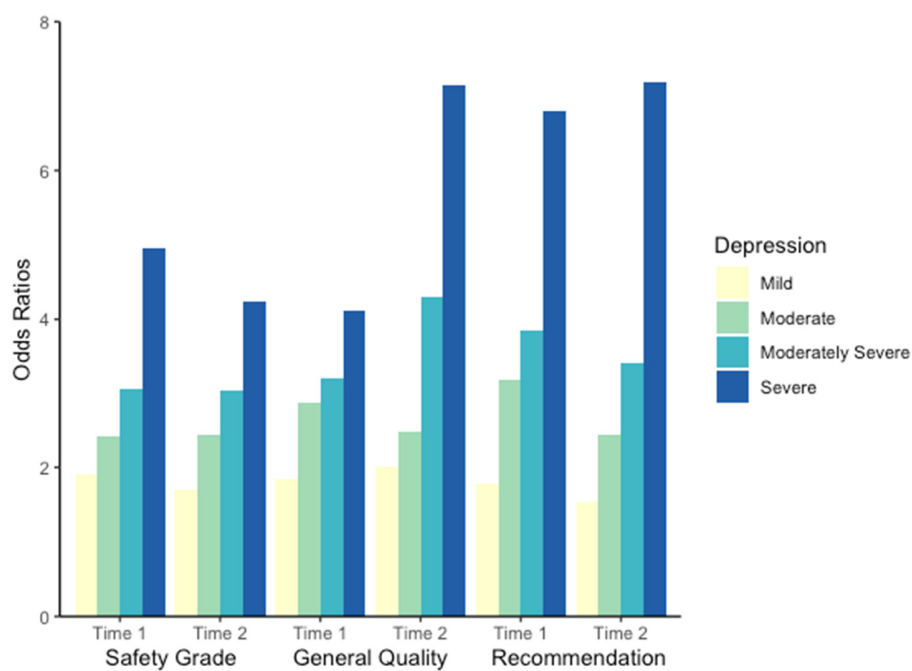

**Figure S2.** A visual depiction of odds ratios representing the relationship between depression and quality safety outcomes before and during COVID-19

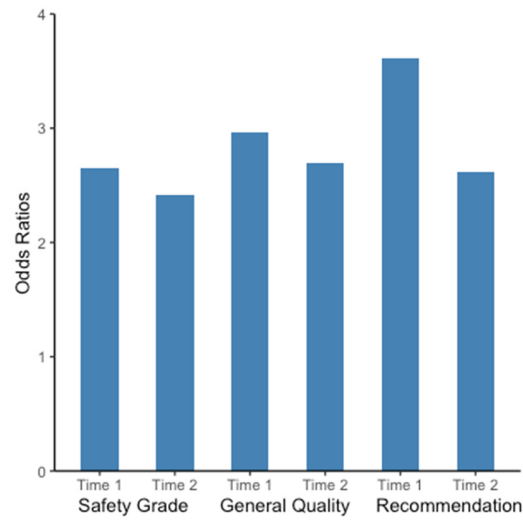

**Figure S3.** A visual depiction of odds ratios representing the relationship between PTSD and quality safety outcomes before and during COVID-19

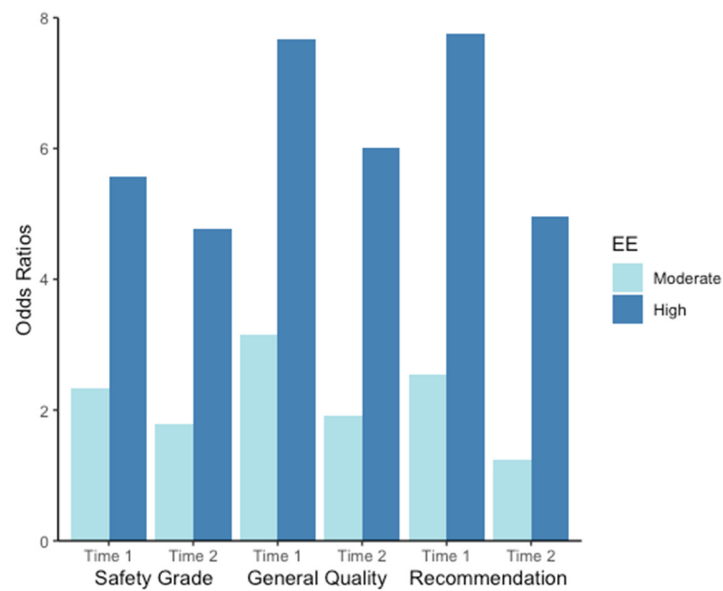

**Figure S4.** A visual depiction of odds ratios representing the relationship between emotional exhaustion and quality safety outcomes before and during COVID-19

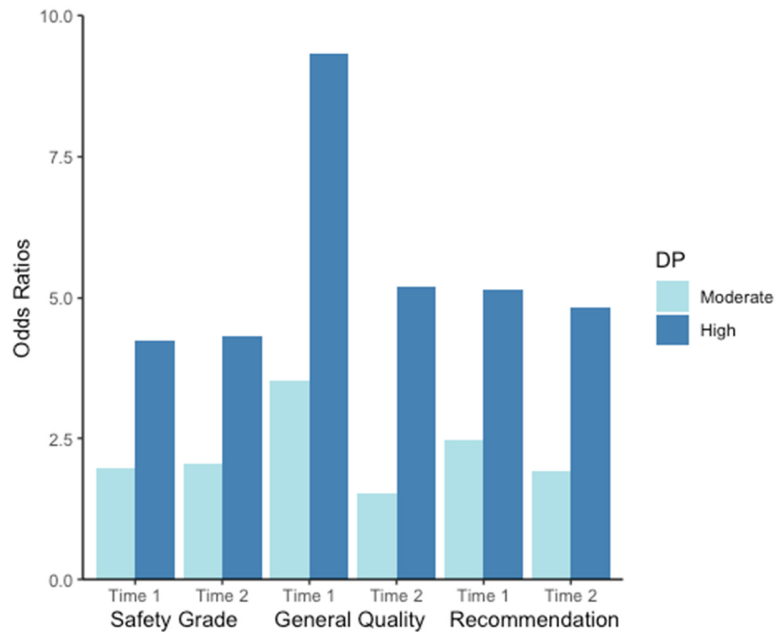

**Figure S5.** A visual depiction of odds ratios representing the relationship between depersonalization and quality safety outcomes before and during COVID-19

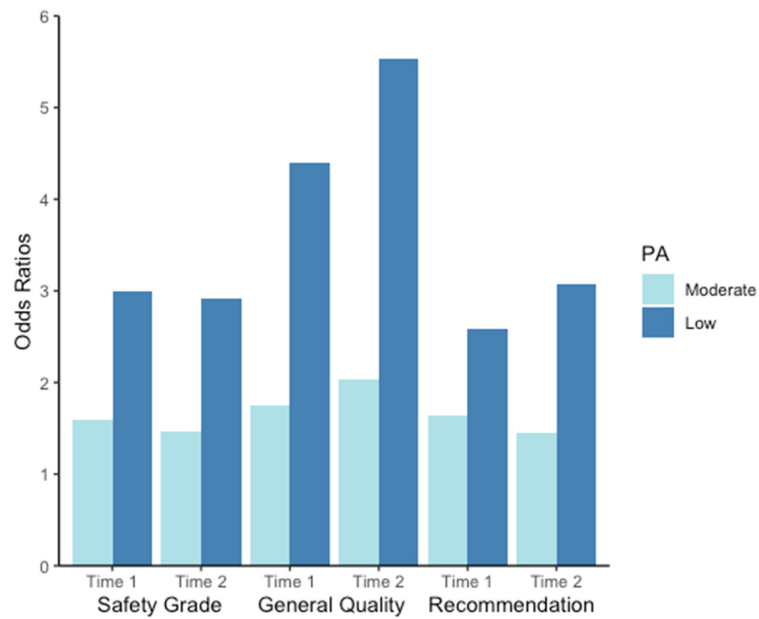

**Figure S6.** A visual depiction of odds ratios representing the relationship between personal accomplishment and quality safety outcomes before and during COVID-19
